# Supplementary material for: Controllable fabrication of LiMnPO4 microspheres assembled by radially arranged nanoplates with highly exposed (010) facets for an enhanced electrochemical performance
Source: Royal Society of Chemistry journal article supplement (doi:10.1039/c9ce01387c), 2019-01-01
Supplement: c9ce01387c1.pdf [file c9ce01387c1.pdf]

## Supplementary information

### Controllable fabrication of $\text{LiMnPO}_4$ nanoplates-radially arranged microspheres with highly exposed (010) facet for enhanced electrochemical performance

Xiaoliang Pan,<sup>\*a</sup> Zhi Gao,<sup>a</sup> Lijun Liu,<sup>b</sup> Shikun Xie,<sup>a</sup> Huiling Yuan<sup>a</sup> and Fen Xiao<sup>a</sup>

*a. School of Mechanical Engineering, Jinggangshan University, Jian, 343009, China.*

*b. School of Chemistry and Chemical Engineering, Jinggangshan University, Jian, 343009, China.*

\*Corresponding author:

E-mail address: xiaoliang\_pan@163.com (X. L. Pan)

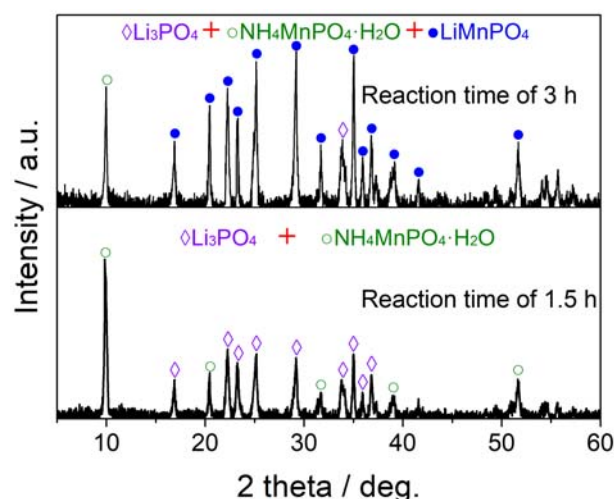

**Fig. S1** XRD patterns of the intermediates obtained for different reaction times.

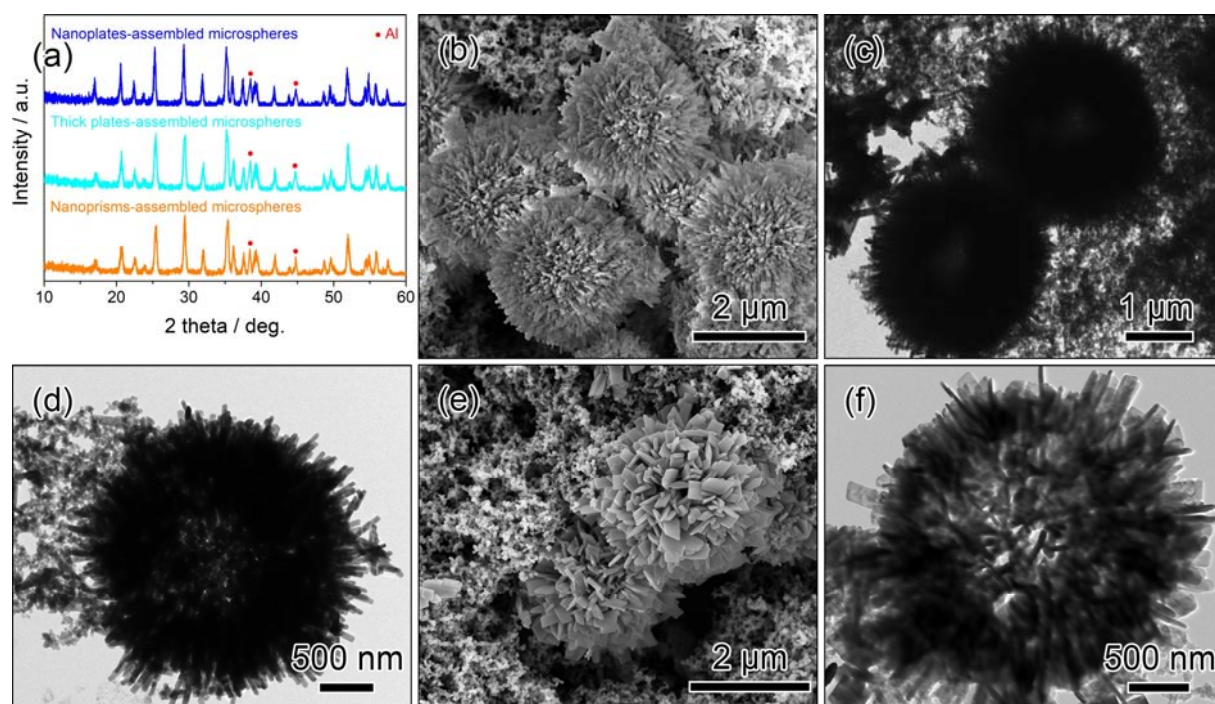

**Fig. S2** XRD patterns (a) of the three microspheres after cycling for 200 cycles at 1 C at the discharge states, and morphological and structural characterizations of the nanoprisms-assembled (b, c and d) and the thick plates-assembled (e and f) microspheres after cycling.
